# Supplementary material for: Inverse Association Between Bystander Use of Audiovisual Feedback From an Automated External Defibrillator and Return of Spontaneous Circulation
Source: PubMed Central journal article supplement — J Am Heart Assoc. 2022 Feb 12;11(4):e023232. doi: 10.1161/JAHA.121.023232 (PMC9245825; doi:10.1161/jaha.121.023232), 2022-02-12
Supplement: JAH3-11-e023232-s001.pdf [file JAH3-11-e023232-s001.pdf]

## **SUPPLEMENTAL MATERIAL**

**Table S1. List of AED models included in the study**

| <b>AED model</b>      | <b>Manufacturer</b>                                    | <b>n</b> | <b>AV feedback</b> | <b>Metronome</b> |
|-----------------------|--------------------------------------------------------|----------|--------------------|------------------|
| Zoll AED Plus         | ZOLL Medical Corporation, Chelmsford, MA, USA          | 153      | Yes                | Yes              |
| Zoll AED Pro          | ZOLL Medical Corporation, Chelmsford, MA, USA          | 2        | Yes                | Yes              |
| LP1000                | Physio-Control Inc., Redmond, WA, USA                  | 52       | No                 | No               |
| LPCRCP                | Physio-Control Inc., Redmond, WA, USA                  | 38       | No                 | No               |
| HeartStart            | Philips, Amsterdam, Holland                            | 23       | No                 | Yes              |
| HeartSine Samaritan   | HeartSine Technologies Ltd., Belfast, Northern Ireland | 20       | No                 | Yes              |
| Powerheart AED G3     | ZOLL Medical Corporation, Chelmsford, MA, USA          | 16       | No                 | Yes              |
| HeartSave (PRIMEDIC)  | Metrax GmbH, Rottweil, Germany                         | 5        | No                 | Yes              |
| IPAD NF1200           | CU Medical Germany GmbH, Berlin, Germany               | 4        | No                 | Yes              |
| CardiAid Monitor Lite | Cardia International A/S, Hoofddorp, Noord-Holland     | 4        | No                 | Yes              |
| LP500                 | Physio-Control Inc., Redmond, WA, USA                  | 3        | No                 | No               |
| FRED easy Life        | Schiller D.O.O., Beograd, Serbia                       | 2        | No                 | N/A              |
| CardiAid Monitor 2    | Cardia International A/S, Hoofddorp, Noord-Holland     | 1        | No                 | Yes              |
| IPAD SP1              | CU Medical Germany GmbH, Berlin, Germany               | 1        | No                 | Yes              |
| HeartReset1           | TELEFUNKEN Licences GmbH, Frankfurt, Germany           | 1        | No                 | Yes              |
